# Supplementary material for: Loss of LSR affects epithelial barrier integrity and tumor xenograft growth of CaCo-2 cells
Source: PubMed Central journal article supplement (PMC5514888; doi:10.18632/oncotarget.10425), 2016-07-06
Supplement: oncotarget-08-37009-s001.pdf [file oncotarget-08-37009-s001.pdf]

## Loss of LSR affects epithelial barrier integrity and tumor xenograft growth of CaCo-2 cells

### Supplementary Materials

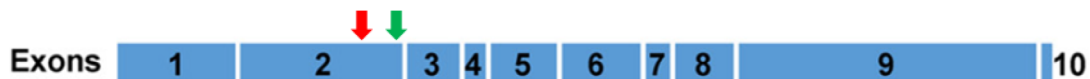

#### LSR-exon 2

CTCCTGCCAGGGCCATCCAGGTGACCGTGTCCAACCCCTACCACGTGGTGATCCTCTTCCAGCCTGTGACCCCT  
 GCCCTGTACCTACCAGATGACCTCGACCCCCACGCAACCCATCGTCATCTGGAAGTACAAGTCTTTCTGCCGG  
 GACCGCATCGCCGATGCCTTCTCCCCGGCCAGCGTCGACAACCAGCTCAATGCCAGCTGGCAGCCGGGAACC  
 CAGGCTACAACCCCTACGTTGAGTGCCA**GGACAGCGTGC****GCACCGTCAGGG**TCGTGGCCACCAAGCAGGGCAA  
 CGCTGTGACCCCTGGGAGATTACTACCAG**GGCCGGAGGATTACCATCACCGGAA**

**Supplementary Figure S1: Targeting sequences of guide RNAs for CRISPR/Cas9-mediated DNA cleavage.** Gene architecture of human LSR gene (exons 1 to 10) is shown (upper panel) and DNA sequence of LSR exon 2 with highlighted sequences indicating targets of the guide RNAs for Cas9 (lower panel). Red, Cas9 targeting sequence for generating CaCo-2<sub>ΔLSR</sub>. Green, Cas9 targeting sequence for generating CaCo-2<sub>ΔLSR-2</sub>.

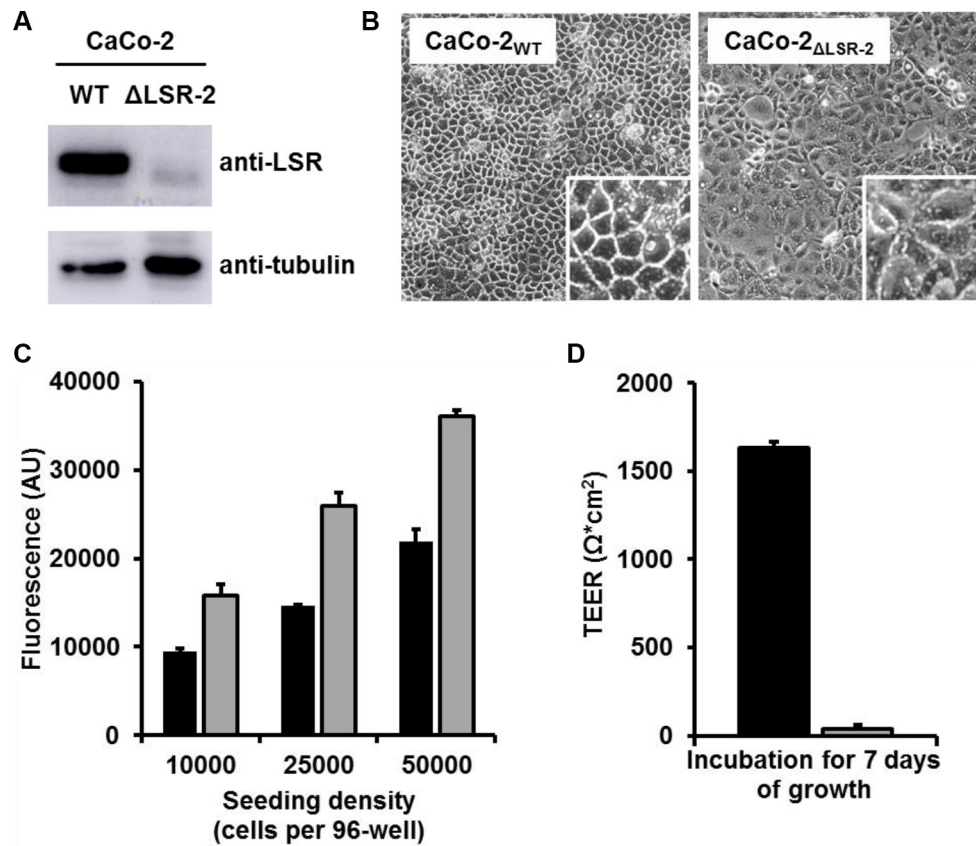

**Supplementary Figure S2: Evaluation of CaCo-2 <sub>$\Delta$ LSR-2</sub> cells.** (A) LSR immunoblot with whole-cell lysates from CaCo-2<sub>WT</sub> (WT) and CaCo-2 <sub>$\Delta$ LSR-2</sub> ( $\Delta$ LSR-2) cells (top panel). Equal loading of samples was verified by detecting tubulin with a specific antibody (bottom panel). (B) Transmitted light microscopy images of confluent cell monolayers from CaCo-2<sub>WT</sub> and CaCo-2 <sub>$\Delta$ LSR-2</sub> cells. (C) Cell viability assay. Absolute resorufin fluorescence values are presented in arbitrary units (AU). Black bars represent fluorescence values obtained with CaCo-2<sub>WT</sub> and grey bars with CaCo-2 <sub>$\Delta$ LSR-2</sub> cells, respectively. Bar graphs represent quantitative analysis of triplicates. The values represent mean  $\pm$  SEM. (D) CaCo-2<sub>WT</sub> and CaCo-2 <sub>$\Delta$ LSR-2</sub> cells were seeded into transwells and incubated for growth. Transepithelial electrical resistance (TEER) was measured after day 7 with a Volt-Ohm meter. TEER results are expressed as absolute TEER values ( $\Omega^*cm^2$ ) with black bars representing CaCo-2<sub>WT</sub> and grey bars representing CaCo-2 <sub>$\Delta$ LSR-2</sub> cells. Bar graphs represent quantitative analysis of triplicates. The values represent mean  $\pm$  SEM.
